# Supplementary material for: Theoretical study of nitrogen-rich CN3− anion and related salts M+[CN3]− (M = Li, Na, K)
Source: Royal Society of Chemistry journal article supplement (doi:10.1039/c2ra21250a), 2012-01-01
Supplement: c2ra21250a.pdf [file c2ra21250a.pdf]

## Theoretical prediction of the nitrogen-rich $\text{CN}_3^-$ and related salts

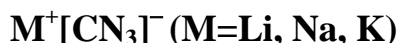

### Supporting Information

Si-meng Gao and Yi-hong Ding\*

*State Key Laboratory of Theoretical and Computational Chemistry, Institute of Theoretical Chemistry, Jilin University, Changchun 130023, People's Republic of China*

**Table S1.** Total energies (a.u.) and relative energies in parentheses (kcal/mol) of the triplet isomers 1, 2, 3, 7, 8, the transition states Ts1/2, Ts1/3 and Ts3/8, Ts1/8 the dissociation products P1, P2, P3, P4 at four levels.

| Species                                                                  | B3LYP/6-311+G(d)         | CCSD(T)/6-311+G(d)//B3LYP/6-311+G(d) | CASPT2(12,12)/6-311+G(d)//CAS SCF(12,12)/6-311+G(d) | CASPT2(12,12)/aug-cc-pVTZ//CA SSCF(12,12)/aug-cc-pVTZ |
|--------------------------------------------------------------------------|--------------------------|--------------------------------------|-----------------------------------------------------|-------------------------------------------------------|
| $\text{CN}_3^-$<br><b>3<sub>1</sub></b>                                  | -202.3577111<br>(0.0)    | -201.8484426<br>(0.0)                | -201.70674254<br>(0.0)                              | -201.94196493<br>(0.0)                                |
| <b>3<sub>2</sub></b>                                                     | -202.3071487<br>(31.7)   | -201.8032282<br>(28.4)               | -201.70693933<br>(-0.1)                             | -201.89706673<br>(28.2)                               |
| <b>3<sub>3</sub></b>                                                     | -202.28352<br>(45.6)     | -201.7767851<br>(45.0)               | —                                                   | -201.86950544<br>(45.5)                               |
| <b>3<sub>7</sub></b>                                                     | -202.2299192<br>(80.2)   | -201.7396822<br>(68.2)               |                                                     | -201.84192110<br>(62.8)                               |
| <b>3<sub>8</sub></b>                                                     |                          | -201.7398872<br>(68.1)               | -201.70402663<br>(68.5)                             | -201.83430543<br>(67.6)                               |
| <b><sup>3</sup>Ts1/2</b>                                                 | -202.3054796<br>(32.8)   | -201.801874<br>(29.2)                | -201.76190156<br>(32.6)                             | -201.89191438<br>(31.4)                               |
| <b><sup>3</sup>Ts1/3</b>                                                 | 202.2604472<br>(61.0)    | -201.770036<br>(49.2)                | —                                                   | —                                                     |
| <b><sup>3</sup>Ts3/8</b>                                                 | -202.2244546<br>(83.6)   | -201.722656<br>(78.9)                | —                                                   | —                                                     |
| <b><sup>3</sup>Ts1/8</b>                                                 | -202.231014<br>(79.5)    | -201.7341205<br>(71.7)               | —                                                   | —                                                     |
| <b><sup>1</sup>CN<sup>-</sup>+N<sub>2</sub></b><br><b>P1</b>             | -202.4481637<br>(-133.7) | -201.9669039<br>(-136.8)             | —                                                   | —                                                     |
| <b><sup>3</sup>CN<sup>-</sup>+N<sub>2</sub></b><br><b>P2</b>             | -202.2459741<br>(-6.8)   | -201.7421784<br>(4.2)                | —                                                   | —                                                     |
| <b><sup>1</sup>CN<sup>-</sup>+<sup>3</sup>N<sub>2</sub></b><br><b>P3</b> | -202.1781228<br>(35.8)   | -201.6882559<br>(38.0)               | —                                                   | —                                                     |
| <b><sup>3</sup>CN<sup>-</sup>+<sup>3</sup>N<sub>2</sub></b>              | -201.9759332             | -201.4635304                         | —                                                   | —                                                     |

|           |         |         |  |  |
|-----------|---------|---------|--|--|
| <b>P4</b> | (162.6) | (179.1) |  |  |
|-----------|---------|---------|--|--|

To obtain more accurate values, we further calculated the energies of 1, 2, 3, 7, and 8 at the CASPT2(12,12)/6-311+G(d)//CASSCF(12,12)/6-311+G(d) and CASPT2(12,12)/aug-cc-pVTZ//CASSCF(12,12)/aug-cc-pVTZ level. The symbol “—” indicates that the values are not calculated.

**Table S2.** Total energies (a.u.) and relative energies in parentheses (kcal/mol) of the singlet isomers 4, 5, 6, the transition states Ts6/P1, Ts2/P1, Ts5/6 and Ts2/3, the dissociation products P1, P2, P3, P4 at four levels.

| Species                                             | B3LYP/6-311+G(d)        | CCSD(T)/6-311+G(d)//B3LYP/6-311+G(d) | CASPT2(12,12)/6-311+G(d)//CAS SCF(12,12)/6-311+G(d) | CASPT2(12,12)/aug-cc-pVTZ//CASSCF(12,12)/aug-cc-pVTZ | CASPT2(12,12)/6-311+G(d)//CASSCF(12,12)/6-311+G(d)+ΔG |
|-----------------------------------------------------|-------------------------|--------------------------------------|-----------------------------------------------------|------------------------------------------------------|-------------------------------------------------------|
| <b>CN<sub>3</sub><sup>-</sup><br/><sup>1</sup>6</b> | -202.2351120<br>(76.9)  | -201.7488716<br>(62.5)               | -201.81312390<br>(66.7)                             | -201.83967532<br>(64.2)                              | -201.71832924<br>(0.0)                                |
| <b><sup>1</sup>4</b>                                | -202.2391007<br>(74.4)  | -201.7536941<br>(59.5)               | -201.76930063<br>(66.6)                             | -201.83430498<br>(67.6)                              | —                                                     |
| <b><sup>1</sup>5</b>                                | -202.2389<br>(74.6)     | -201.74967<br>(62.0)                 | -201.74088059<br>(79.1)                             | -201.81522404<br>(79.5)                              | —                                                     |
| <b><sup>1</sup>Ts6/P1</b>                           | -202.1743479<br>(115.1) | -201.6843834<br>(102.9)              | -201.64515505<br>(105.4)                            | -201.77237323<br>(106.4)                             | -201.65904204<br>(37.2)                               |
| <b><sup>1</sup>Ts4/P1</b>                           | -202.2251786<br>(83.2)  | -201.7472513<br>(63.5)               | -201.70484807<br>(67.9)                             | -201.77237323<br>(68.1)                              | —                                                     |
| <b><sup>1</sup>Ts5/6</b>                            | -202.1804205<br>(111.3) | -201.6825231<br>(104.1)              | -201.70484807<br>(111.7)                            | -201.76807884<br>(109.1)                             | —                                                     |
| <b><sup>1</sup>Ts5/P1</b>                           | -202.231014<br>(79.5)   | -201.7397128<br>(68.2)               | —                                                   | —                                                    | —                                                     |
| <b><sup>1</sup>Ts4/5</b>                            | -202.2360363<br>(76.4)  | -201.7470932<br>(63.6)               | —                                                   | —                                                    | —                                                     |

To obtain more accurate values, we further calculated the energies of 4, 5, 6, Ts6/P1, Ts4/P1, Ts5/P1, Ts4/5 and Ts5/6 at the CASPT2(12,12)/6-311+G(d)//CASSCF(12,12)/6-311+G(d) and CASPT2(12,12)/aug-cc-pVTZ//CASSCF(12,12)/aug-cc-pVTZ level. The symbol “—” indicates that the values are not calculated.

**Table S3.** Calculated geometrical parameters and total energies (a.u.) of the  $^3\mathbf{1}$  and conical intersections between singlet and triplet at CASSCF(8,8)/6-311+G(d) level.

| species     | $^3\mathbf{1}$ | Conical intersection for process $\text{NCNN}^- (\text{C}_s) \rightarrow \text{CN} + \text{N}_2$ |
|-------------|----------------|--------------------------------------------------------------------------------------------------|
| C1–N2       | 1.171          | 1.191                                                                                            |
| C1–N3       | 1.311          | 1.256                                                                                            |
| N3–N4       | 1.311          | 1.367                                                                                            |
| N2–C1–N3    | 176.4          | 179.8                                                                                            |
| C1–N3–N4    | 116.2          | 120.2                                                                                            |
| N2–C1–N3–N4 | 180.0          | 180.0                                                                                            |
| energy      | -201.80968178  | -201.77688152                                                                                    |

Bond lengths are in angstroms and angles in degrees.

**Table S4.** Calculated geometrical parameters and total energies (a.u.) of the Ts6/P1 and conical intersections between singlet and triplet at CASSCF(12,12)/6-311+G(d) level.

| species     | Ts6/P1        | Conical intersection for process $\text{CN}_3^- (\text{C}_s) \rightarrow \text{CN} + \text{N}_2$ |
|-------------|---------------|--------------------------------------------------------------------------------------------------|
| C1–N2       | 1.361         | 1.381                                                                                            |
| C1–N3       | 1.586         | 1.581                                                                                            |
| C1–N4       | 1.586         | 1.581                                                                                            |
| N3–N4       | 1.292         | 1.293                                                                                            |
| N2–C1–N4    | 80.2          | 80.4                                                                                             |
| N2–C1–N3    | 80.2          | 80.4                                                                                             |
| N3–C1–N4    | 48.1          | 48.2                                                                                             |
| C1–N2–N3–N4 | 75.4          | 75.1                                                                                             |
| N2–C1–N4–N3 | 85.6          | 85.7                                                                                             |
| energy      | -201.64515960 | -201.64302416                                                                                    |

Bond lengths are in angstroms and angles in degrees.
